# Supplementary material for: Genetic Adaptation of Coxsackievirus B1 during Persistent Infection in Pancreatic Cells
Source: PubMed Central journal article supplement (PMC7697981; doi:10.3390/microorganisms8111790), 2020-11-15
Supplement: microorganisms-08-01790-s001.pdf [file microorganisms-08-01790-s001.pdf]

## Supplementary material

2A

| A2V                | F3L                | Y11C                 | Y11H             | N14T               | T46I               | A47V                 | C50R               | K70T             | H71Y                 | G80R              | E86G               | Y89H               | V120I             | G130D             | A147V             |
|--------------------|--------------------|----------------------|------------------|--------------------|--------------------|----------------------|--------------------|------------------|----------------------|-------------------|--------------------|--------------------|-------------------|-------------------|-------------------|
| CVB1 10796, PANC-1 | CVB1 10797, PANC-1 | CVB1 ATCC E1, PANC-1 | CVB1 ATCC, 1.1B4 | CVB1 10802, PANC-1 | CVB1 10796, PANC-1 | CVB1 ATCC E2, PANC-1 | CVB1 10796, PANC-1 | CVB1 ATCC, 1.1B4 | CVB1 ATCC E1, PANC-1 | CVB1 10802, 1.1B4 | CVB1 10796, PANC-1 | CVB1 10796, PANC-1 | CVB1 10802, 1.1B4 | CVB1 10802, 1.1B4 | CVB1 10796, 1.1B4 |

2B

| N11H             | S15L                 | I50V               | K58R               | Y91H             | D92G               |
|------------------|----------------------|--------------------|--------------------|------------------|--------------------|
| CVB1 ATCC, 1.1B4 | CVB1 ATCC E1, PANC-1 | CVB1 10802, PANC-1 | CVB1 10796, PANC-1 | CVB1 ATCC, 1.1B4 | CVB1 10796, PANC-1 |
|                  | CVB1 ATCC E2, PANC-1 |                    |                    |                  | CVB1 10796, 1.1B4  |
|                  | CVB1 ATCC, 1.1B4     |                    |                    |                  |                    |

2C

| LSF                  | T9A                  | V34F              | P54S              | S58N              | S130G                | L150F                | M175L              | V187I            | L212M            | P216S              | I251V            | M253L             | K259R              | T268A                | V276A              | R296G              | M310L             | Y314H              |
|----------------------|----------------------|-------------------|-------------------|-------------------|----------------------|----------------------|--------------------|------------------|------------------|--------------------|------------------|-------------------|--------------------|----------------------|--------------------|--------------------|-------------------|--------------------|
| CVB1 ATCC E1, PANC-1 | CVB1 ATCC E2, PANC-1 | CVB1 10796, 1.1B4 | CVB1 10802, 1.1B4 | CVB1 10796, 1.1B4 | CVB1 ATCC E1, PANC-1 | CVB1 ATCC E2, PANC-1 | CVB1 10796, PANC-1 | CVB1 ATCC, 1.1B4 | CVB1 ATCC, 1.1B4 | CVB1 10802, PANC-1 | CVB1 ATCC, 1.1B4 | CVB1 10802, 1.1B4 | CVB1 10797, PANC-1 | CVB1 ATCC E1, PANC-1 | CVB1 10802, PANC-1 | CVB1 10797, PANC-1 | CVB1 10802, 1.1B4 | CVB1 10802, PANC-1 |
| CVB1 ATCC, 1.1B4     |                      |                   |                   |                   |                      |                      | CVB1 10796, 1.1B4  |                  |                  |                    |                  |                   |                    |                      |                    |                    |                   | CVB1 10802, 1.1B4  |

**Figure S1.** Mutations on 2A, 2B and 2C non-structural proteins in all CVB1 PIDVs established in TP2. The location and the corresponding amino acid substitution are shown in the top line and the corresponding PIDVs are presented below. I50V in 2B, marked with grey color, is in hydrophobic domain of and K58R in hydrophilic domain. M175L, marked with grey color in 2C is in ATPase motif B region.

| Virus                | TCID <sub>50</sub> /ml |
|----------------------|------------------------|
| ATCC E1-PIDV[PANC-1] | 1.86E+05               |
| ATCC E2-PIDV[PANC-1] | 8.62E+05               |
| 10796-PIDV[PANC-1]   | 1.92E+06               |

**Table S1.** The 50% endpoint titers for CVB1 ATCC and CVB1 10796 viruses in PANC-1 cell model (in TCID<sub>50</sub>/ml) measured by TCID<sub>50</sub> assay for 6.8 months post infection.

| Virus        | Cell type | CVB1 reads | Human reads <sup>1</sup> | mRNA | CVB/Human% <sup>2</sup> |
|--------------|-----------|------------|--------------------------|------|-------------------------|
| CVB1 ATCC E1 | PANC-1    | 18258      | 574736                   | 844  | 3.20 %                  |
| CVB1 ATCC E2 | PANC-1    | 15664      | 600530                   | 1348 | 2.60 %                  |
| CVB1 10796   | PANC-1    | 31963      | 547795                   | 1232 | 5.80 %                  |
| CVB1 10802   | PANC-1    | 85084      | 737236                   | 846  | 11.50 %                 |
| CVB1 10797   | PANC-1    | 76878      | 744692                   | 697  | 10.30 %                 |

|            |       |        |        |      |         |
|------------|-------|--------|--------|------|---------|
| CVB1 ATCC  | 1.1B4 | 118737 | 702899 | 1265 | 16.70 % |
| CVB1 10796 | 1.1B4 | 140833 | 661179 | 2086 | 21.20 % |
| CVB1 10802 | 1.1B4 | 220998 | 671472 | 2010 | 32.80 % |

1. GRCH37, human reference genome. 2. CVB1/(GRCH37+mRNA)

**Table S2.** Human alignment is processed from Vipie virome pipeline [1] based on de novo Velvet [2] contig mapping using minimum Kmer 51 (data is available upon request). The mean CVB/Human Proportions of all samples are 13.01% (PANC-1 6.68% and 1.1B4 23.57%).

## References

1. Lin, J.; Kramna, L.; Autio, R.; Hyoty, H.; Nykter, M.; Cinek, O. Vipie: web pipeline for parallel characterization of viral populations from multiple NGS samples. *BMC Genomics* **2017**, *18*, 378-7, DOI 10.1186/s12864-017-3721-7 [doi].
2. Zerbino, D.R.; Birney, E. Velvet: algorithms for de novo short read assembly using de Bruijn graphs. *Genome Res* **2008**, *18*, 821-829, DOI 10.1101/gr.074492.107 [doi].
